# Supplementary material for: Pervasive Transcription of the Human Genome Produces Thousands of Previously Unidentified Long Intergenic Noncoding RNAs
Source: PLoS Genet. 2013 Jun 20;9(6):e1003569. doi: 10.1371/journal.pgen.1003569 (PMC3688513; doi:10.1371/journal.pgen.1003569)
Supplement: Table S1 — Features of the RNA-seq datasets analyzed. P values correspond to a binomial test of proportion of the FPKM = 1 expression threshold in each dataset (see Methods). (XLSX) [file pgen.1003569.s018.xlsx]

## Sheet: Individual Datasets
Table S1. RNA-seq datasets analyzed
Dataset (novel datasets in bold)	Library type	Read lengths	Total reads	Single end	Properly paired	Singleton	Total fragments	Location of data source	Notes
A549_Rep1_Myers	polyA+	36	19642226	19642226			19642226	http://www.ncbi.nlm.nih.gov/sra/SRX006805
A549_Rep2_Myers	polyA+	36	24493268	24493268			24493268	http://www.ncbi.nlm.nih.gov/sra/SRX006807
adipose_Burge	polyA+	32	15452670	15452670			15452670	http://www.ncbi.nlm.nih.gov/projects/geo/query/acc.cgi?acc=GSE12946
adipose_Raymond	rRNA-depleted	28	13245000	13245000			13245000	ftp://ftp.sra.ebi.ac.uk/vol1/ERA010/ERA010380/illumina_native/
B_cells_Cheung	polyA+	50	679651776	679651776			679651776	http://www.ncbi.nlm.nih.gov/geo/query/acc.cgi?acc=GSE16921	all files from SRR032238 to SRR032269 were analyzed together
B_cells_Pritchard	polyA+	46	730388847	730388847			730388847	http://www.ncbi.nlm.nih.gov/geo/query/acc.cgi?acc=GSE19480	all files from SRR031811 to SRR031963 were analyzed together
brain_Burge	polyA+	36	5312930	5312930			5312930	http://www.ncbi.nlm.nih.gov/projects/geo/query/acc.cgi?acc=GSE12946
brain_Hughes	polyA+	50	32774445		19265528	5636369	15269133	http://hugheslab.ccbr.utoronto.ca/supplementary-data/hm_transcriptome/	the file Human Brain (Solexa fastq, 1.2 Gb) was analyzed
brain_Wong	polyA+	50	25785231		13467744	6280849	13014721	http://www.ncbi.nlm.nih.gov/projects/geo/query/acc.cgi?acc=GSE19166
breast_Burge	polyA+	32	9205212	9205212			9205212	http://www.ncbi.nlm.nih.gov/projects/geo/query/acc.cgi?acc=GSE12946
BreastStem_RM080_UCSF-UBC-REMC	polyA+	76	94201386		66149998	17678336	50753335	http://www.ncbi.nlm.nih.gov/projects/geo/query/acc.cgi?acc=GSE16368
BT20_Thompson	polyA+	50	44713682		25079834	6947650	19487567	http://www.ncbi.nlm.nih.gov/projects/geo/query/acc.cgi?acc=GSE27003
BT474_Burge	polyA+	32	9841400	9841400			9841400	http://www.ncbi.nlm.nih.gov/projects/geo/query/acc.cgi?acc=GSE12946
BT474_Thompson	polyA+	50	38802093		18587034	9596181	18889698	http://www.ncbi.nlm.nih.gov/projects/geo/query/acc.cgi?acc=GSE27003
CD4_activated_Ind1_Plagnol	polyA+	45	14113846		9554214	3108920	7886027	http://www.ncbi.nlm.nih.gov/sra?term=SRA008367
CD4_activated_Ind2_Plagnol	polyA+	45	33747265		15874472	4869708	12806944	http://www.ncbi.nlm.nih.gov/sra?term=SRA008367
CD4_activated_Ind3_Plagnol	polyA+	45	14878376		9256694	3294636	7922983	http://www.ncbi.nlm.nih.gov/sra?term=SRA008367
CD4_activated_Ind4_Plagnol	polyA+	45	15114383		6861342	2244538	5675209	http://www.ncbi.nlm.nih.gov/sra?term=SRA008367
CD4_resting_Ind1_Plagnol	polyA+	45	8514136		5483272	1886968	4628604	http://www.ncbi.nlm.nih.gov/sra?term=SRA008367
CD4_resting_Ind2_Plagnol	polyA+	45	23260740		14646304	5754908	13078060	http://www.ncbi.nlm.nih.gov/sra?term=SRA008367
CD4_resting_Ind3_Plagnol	polyA+	45	16962805		8347818	2332365	6506274	http://www.ncbi.nlm.nih.gov/sra?term=SRA008367
CD4_resting_Ind4_Plagnol	polyA+	45	14067307		6446774	1978943	5202330	http://www.ncbi.nlm.nih.gov/sra?term=SRA008367
CD4_Snyder	rRNA-depleted	47	43039278	43039278			43039278	http://www.ncbi.nlm.nih.gov/geo/query/acc.cgi?acc=GSM501716
colon_Burge	polyA+	32	14973234	14973234			14973234	http://www.ncbi.nlm.nih.gov/projects/geo/query/acc.cgi?acc=GSE12946
colon_Raymond	rRNA-depleted	28	18060138	18060138			18060138	ftp://ftp.sra.ebi.ac.uk/vol1/ERA010/ERA010380/illumina_native/
H1_Caltech-ENCODE_Rep2	polyA+	75	58213846		38693416	12751212	32097920	http://genome.ucsc.edu/cgi-bin/hgTrackUi?db=hg18&g=wgEncodeCaltechRnaSeq	only analyzed paired end data
H1_Caltech-ENCODE_Rep4	polyA+	75	20099315		13718572	4885337	11744623	http://genome.ucsc.edu/cgi-bin/hgTrackUi?db=hg18&g=wgEncodeCaltechRnaSeq	only analyzed paired end data
H1_GIS-ENCODE	polyA+	75	11676921	11676921			11676921	http://hgdownload.cse.ucsc.edu/goldenPath/hg18/encodeDCC/wgEncodeGisRnaSeq/
H1_RepA_Snyder	polyA+	36	14096336	2115542	6951960	3820952	9412474	http://www.ncbi.nlm.nih.gov/projects/geo/query/acc.cgi?acc=GSE20301	all fastq files within hESC_A_p1_1 were analyzed together
H1_RepB_Snyder	polyA+	35	49819009	36927598	7551806	2509059	43212560	http://www.ncbi.nlm.nih.gov/projects/geo/query/acc.cgi?acc=GSE20301	all fastq files within hESC_B_p1_1 were analyzed together
H1_UCSD-REMC	rRNA-depleted	87	23303279	23303279			23303279	http://www.ncbi.nlm.nih.gov/sra?term=SRX007165
H1_UCSF-UBC-REMC	polyA+	51	210510533		108452544	40629601	94855873	http://www.ncbi.nlm.nih.gov/projects/geo/query/acc.cgi?acc=GSE16368
H9_polyA-_Chen	polyA-	75	11515512	11515512			11515512	http://www.ncbi.nlm.nih.gov/projects/geo/query/acc.cgi?acc=GSE24399
H9_polyA+_Chen	polyA+	75	24261545	24261545			24261545	http://www.ncbi.nlm.nih.gov/projects/geo/query/acc.cgi?acc=GSE24399
H9_Wysocka	polyA+	36	17334014	17334014			17334014	http://www.ncbi.nlm.nih.gov/projects/geo/query/acc.cgi?acc=GSE24447
heart_Burge	polyA+	32	8244056	8244056			8244056	http://www.ncbi.nlm.nih.gov/projects/geo/query/acc.cgi?acc=GSE12946
heart_Raymond	rRNA-depleted	28	13683163	13683163			13683163	ftp://ftp.sra.ebi.ac.uk/vol1/ERA010/ERA010380/illumina_native/
HeLa_miR-1_12hr_Bartel	polyA+	36	4526588	4526588			4526588	http://www.ncbi.nlm.nih.gov/projects/geo/query/acc.cgi?acc=GSE22004
HeLa_miR-1_32hr_Bartel	polyA+	36	1502525	1502525			1502525	http://www.ncbi.nlm.nih.gov/projects/geo/query/acc.cgi?acc=GSE22004
HeLa_miR-155_12hr_Bartel	polyA+	36	4758102	4758102			4758102	http://www.ncbi.nlm.nih.gov/projects/geo/query/acc.cgi?acc=GSE22004
HeLa_miR-155_32hr_Bartel	polyA+	36	2198813	2198813			2198813	http://www.ncbi.nlm.nih.gov/projects/geo/query/acc.cgi?acc=GSE22004
HeLa_polyA-_Chen	polyA+	36	5115286	5115286			5115286	http://www.ncbi.nlm.nih.gov/projects/geo/query/acc.cgi?acc=GSE22004
HeLa_polyA+_Chen	polyA+	36	1398455	1398455			1398455	http://www.ncbi.nlm.nih.gov/projects/geo/query/acc.cgi?acc=GSE22004
HeLa_WT_12hr_Bartel	polyA-	75	12901556	12901556			12901556	http://www.ncbi.nlm.nih.gov/projects/geo/query/acc.cgi?acc=GSE24399
HeLa_WT_32hr_Bartel	polyA+	75	35573880	35573880			35573880	http://www.ncbi.nlm.nih.gov/projects/geo/query/acc.cgi?acc=GSE24399
HepG2_Caltech-ENCODE_Rep1	polyA+	75	41150856	19995690	14173440	4687426	31769836	http://hgdownload.cse.ucsc.edu/goldenPath/hg18/encodeDCC/wgEncodeCaltechRnaSeq/
HepG2_Caltech-ENCODE_Rep2	polyA+	75	120041862	14804637	59295356	24568231	69020546	http://hgdownload.cse.ucsc.edu/goldenPath/hg18/encodeDCC/wgEncodeCaltechRnaSeq/
HME_Burge	polyA+	32	10676314	10676314			10676314	http://www.ncbi.nlm.nih.gov/projects/geo/query/acc.cgi?acc=GSE12946
IMR90_REMC-UCSD	rRNA-depleted	87	14576992	14576992			14576992	http://www.ncbi.nlm.nih.gov/geo/query/acc.cgi?acc=GSM438363	analyzed as stranded RNA-seq data
K562_Caltech-ENCODE_Rep1	polyA+	76	16719516	16719516			16719516	http://hgdownload.cse.ucsc.edu/goldenPath/hg18/encodeDCC/wgEncodeCaltechRnaSeq/
K562_Caltech-ENCODE_Rep2	polyA+	76	27104753	27104753			27104753	http://hgdownload.cse.ucsc.edu/goldenPath/hg18/encodeDCC/wgEncodeCaltechRnaSeq/
K562_CSHL-ENCODE	polyA+	36	22980419	22980419			22980419	http://hgdownload.cse.ucsc.edu/goldenPath/hg18/encodeDCC/wgEncodeCshlLongRnaSeq/
K562_Garraway_Rep1	polyA+	51	14451983		1037532	3789781	4308547	http://www.ncbi.nlm.nih.gov/projects/geo/query/acc.cgi?acc=GSE17593	SRR018268 was analyzed
K562_Garraway_Rep2	polyA+	51	14337450		2785104	3812448	5205000	http://www.ncbi.nlm.nih.gov/projects/geo/query/acc.cgi?acc=GSE17593	SRR018269 was analyzed
kidney_Raymond	rRNA-depleted	28	14709474	14709474			14709474	ftp://ftp.sra.ebi.ac.uk/vol1/ERA010/ERA010380/illumina_native/
liver_Blencowe	polyA+	32	9977870	9977870			9977870	http://www.ncbi.nlm.nih.gov/geo/query/acc.cgi?acc=GSE13652
liver_Burge	polyA+	32	9985384	9985384			9985384	http://www.ncbi.nlm.nih.gov/projects/geo/query/acc.cgi?acc=GSE12946
liver_female_Rep1_Gilad2	polyA+	35	6642800	6642800			6642800	http://www.ncbi.nlm.nih.gov/geo/query/acc.cgi?acc=GSE17274
liver_female_Rep2_Gilad2	polyA+	35	6635948	6635948			6635948	http://www.ncbi.nlm.nih.gov/geo/query/acc.cgi?acc=GSE17274
liver_female_Rep3_Gilad2	polyA+	35	6910651	6910651			6910651	http://www.ncbi.nlm.nih.gov/geo/query/acc.cgi?acc=GSE17274
liver_Gilad	polyA+	36	20260724	20260724			20260724	http://www.ncbi.nlm.nih.gov/Traces/sra/sra.cgi?study=SRP000225
liver_male_Rep1_Gilad2	polyA+	35	5874122	5874122			5874122	http://www.ncbi.nlm.nih.gov/geo/query/acc.cgi?acc=GSE17274
liver_male_Rep2_Gilad2	polyA+	35	8768491	8768491			8768491	http://www.ncbi.nlm.nih.gov/geo/query/acc.cgi?acc=GSE17274
liver_male_Rep3_Gilad2	polyA+	35	8528339	8528339			8528339	http://www.ncbi.nlm.nih.gov/geo/query/acc.cgi?acc=GSE17274
liver_Raymond	rRNA-depleted	28	13297129	13297129			13297129	ftp://ftp.sra.ebi.ac.uk/vol1/ERA010/ERA010380/illumina_native/
LuminalBreast_RM035_UCSF-UBC-REMC	polyA+	76	178170024		127074952	30437902	93975378	http://www.ncbi.nlm.nih.gov/projects/geo/query/acc.cgi?acc=GSE16368
LuminalBreast_RM080_UCSF-UBC-REMC	polyA+	76	95111160		68134290	18692518	52759663	http://www.ncbi.nlm.nih.gov/projects/geo/query/acc.cgi?acc=GSE16368
lung_Raymond	rRNA-depleted	28	12100899	12100899			12100899	ftp://ftp.sra.ebi.ac.uk/vol1/ERA010/ERA010380/illumina_native/
lymph_node_Burge	polyA+	32	14287364	14287364			14287364	http://www.ncbi.nlm.nih.gov/projects/geo/query/acc.cgi?acc=GSE12946
MB435_Burge	polyA+	32	10957617	10957617			10957617	http://www.ncbi.nlm.nih.gov/projects/geo/query/acc.cgi?acc=GSE12946
MCF10A_Thompson	polyA+	50	41470013		21107652	6167839	16721665	http://www.ncbi.nlm.nih.gov/projects/geo/query/acc.cgi?acc=GSE27003
MCF7_Burge	polyA+	32	8857760	8857760			8857760	http://www.ncbi.nlm.nih.gov/projects/geo/query/acc.cgi?acc=GSE12946
MCF7_Thompson	polyA+	50	39316667		21030080	6272075	16787115	http://www.ncbi.nlm.nih.gov/projects/geo/query/acc.cgi?acc=GSE27003
MDAMB231_Thompson	polyA+	50	28385230		9627782	13553966	18367857	http://www.ncbi.nlm.nih.gov/projects/geo/query/acc.cgi?acc=GSE27003
MDAMB468_Thompson	polyA+	50	40143442		24968252	7479310	19963436	http://www.ncbi.nlm.nih.gov/projects/geo/query/acc.cgi?acc=GSE27003
MeI_Garraway	polyA+	51	12156128		2297042	3538588	4687109	http://www.ncbi.nlm.nih.gov/projects/geo/query/acc.cgi?acc=GSE17593
melanoma_M000216_Garraway	polyA+	51	11441971		956634	3190765	3669082	http://www.ncbi.nlm.nih.gov/projects/geo/query/acc.cgi?acc=GSE17593
melanoma_M000921_Garraway	polyA+	51	14294221		831576	3590677	4006465	http://www.ncbi.nlm.nih.gov/projects/geo/query/acc.cgi?acc=GSE17593
melanoma_M010403_Garraway	polyA+	51	8007145		1423634	2118981	2830798	http://www.ncbi.nlm.nih.gov/projects/geo/query/acc.cgi?acc=GSE17593
melanoma_M970109_Garraway	polyA+	51	10803171		1363080	3590731	4272271	http://www.ncbi.nlm.nih.gov/projects/geo/query/acc.cgi?acc=GSE17593
melanoma_M980409_Garraway	polyA+	51	9521381		1724378	3593229	4455418	http://www.ncbi.nlm.nih.gov/projects/geo/query/acc.cgi?acc=GSE17593
melanoma_M980928_Garraway	polyA+	51	11886309		1295062	3530015	4177546	http://www.ncbi.nlm.nih.gov/projects/geo/query/acc.cgi?acc=GSE17593
melanoma_M990514_Garraway	polyA+	51	11989475		1788090	3525995	4420040	http://www.ncbi.nlm.nih.gov/projects/geo/query/acc.cgi?acc=GSE17593
melanoma_M990802_Garraway	polyA+	51	11049426		1585808	3817710	4610614	http://www.ncbi.nlm.nih.gov/projects/geo/query/acc.cgi?acc=GSE17593
MeWo_Garraway	polyA+	51	38251673		2293592	10584673	11731469	http://www.ncbi.nlm.nih.gov/projects/geo/query/acc.cgi?acc=GSE17593
MIP101_Marra	polyA+	36	190008680		87135864	46799440	90367372	ftp://ftp03.bcgsc.ca/public/ALEXA/alexa_seq/MIP101_Fastq_RawData.tar.gz
MyoepithelialBreast_RM035_UCSF-UBC-REMC	polyA+	75	90810369		32656534	47343975	63672242	http://www.ncbi.nlm.nih.gov/projects/geo/query/acc.cgi?acc=GSE16368
MyoepithelialBreast_RM080_UCSF-UBC-REMC	polyA+	76	92614016		62856118	18178446	49606505	http://www.ncbi.nlm.nih.gov/projects/geo/query/acc.cgi?acc=GSE16368
NEC_from_H9_Wysocka	polyA+	36	18121381	18121381			18121381	http://www.ncbi.nlm.nih.gov/projects/geo/query/acc.cgi?acc=GSE24447
ovary_Raymond	rRNA-depleted	28	35179025	35179025			35179025	ftp://ftp.sra.ebi.ac.uk/vol1/ERA010/ERA010380/illumina_native/
prostate_carcinoma_C02_Yen	polyA+	36	7150001		4871944	1214863	3650835	http://www.ncbi.nlm.nih.gov/projects/geo/query/acc.cgi?acc=GSE22260
prostate_carcinoma_C03_Yen	polyA+	36	5436521		3964080	898927	2880967	http://www.ncbi.nlm.nih.gov/projects/geo/query/acc.cgi?acc=GSE22260
prostate_carcinoma_C05_Yen	polyA+	36	17890278		11597758	3435824	9234703	http://www.ncbi.nlm.nih.gov/projects/geo/query/acc.cgi?acc=GSE22260
prostate_carcinoma_C06_Yen	polyA+	36	8655196		5670040	1457704	4292724	http://www.ncbi.nlm.nih.gov/projects/geo/query/acc.cgi?acc=GSE22260
prostate_carcinoma_C07_Yen	polyA+	36	18802103		12607374	3401981	9705668	http://www.ncbi.nlm.nih.gov/projects/geo/query/acc.cgi?acc=GSE22260
prostate_carcinoma_C08_Yen	polyA+	36	5275961		3595814	974931	2772838	http://www.ncbi.nlm.nih.gov/projects/geo/query/acc.cgi?acc=GSE22260
prostate_carcinoma_C09_Yen	polyA+	36	4711695		3278232	896111	2535227	http://www.ncbi.nlm.nih.gov/projects/geo/query/acc.cgi?acc=GSE22260
prostate_carcinoma_C11_Yen	polyA+	36	13317032		8910632	3057176	7512492	http://www.ncbi.nlm.nih.gov/projects/geo/query/acc.cgi?acc=GSE22260
prostate_carcinoma_C13_Yen	polyA+	36	20314107		13229994	3733203	10348200	http://www.ncbi.nlm.nih.gov/projects/geo/query/acc.cgi?acc=GSE22260
prostate_carcinoma_C15_Yen	polyA+	36	21337995		14337626	3685537	10854350	http://www.ncbi.nlm.nih.gov/projects/geo/query/acc.cgi?acc=GSE22260
prostate_carcinoma_C16_Yen	polyA+	36	20353020		15054698	4034930	11562279	http://www.ncbi.nlm.nih.gov/projects/geo/query/acc.cgi?acc=GSE22260
prostate_carcinoma_C18_Yen	polyA+	36	21006973		13347708	3717265	10391119	http://www.ncbi.nlm.nih.gov/projects/geo/query/acc.cgi?acc=GSE22260
prostate_carcinoma_C19_Yen	polyA+	36	20886227		14505002	3631383	10883884	http://www.ncbi.nlm.nih.gov/projects/geo/query/acc.cgi?acc=GSE22260
prostate_carcinoma_C23_Yen	polyA+	36	19900979		14253000	3369069	10495569	http://www.ncbi.nlm.nih.gov/projects/geo/query/acc.cgi?acc=GSE22260
prostate_carcinoma_C27_Yen	polyA+	36	20586242		13261544	3903088	10533860	http://www.ncbi.nlm.nih.gov/projects/geo/query/acc.cgi?acc=GSE22260
prostate_carcinoma_C29_Yen	polyA+	36	21482728		14660096	3917134	11247182	http://www.ncbi.nlm.nih.gov/projects/geo/query/acc.cgi?acc=GSE22260
prostate_carcinoma_C33_Yen	polyA+	36	19612488		12479680	3743724	9983564	http://www.ncbi.nlm.nih.gov/projects/geo/query/acc.cgi?acc=GSE22260
prostate_carcinoma_C37_Yen	polyA+	36	12702891		6742522	3937369	7308630	http://www.ncbi.nlm.nih.gov/projects/geo/query/acc.cgi?acc=GSE22260
prostate_carcinoma_C40_Yen	polyA+	36	21028092		14226152	3747554	10860630	http://www.ncbi.nlm.nih.gov/projects/geo/query/acc.cgi?acc=GSE22260
prostate_normal_N02_Yen	polyA+	36	5412204		3916256	939386	2897514	http://www.ncbi.nlm.nih.gov/projects/geo/query/acc.cgi?acc=GSE22260
prostate_normal_N03_Yen	polyA+	36	5285055		3807844	910287	2814209	http://www.ncbi.nlm.nih.gov/projects/geo/query/acc.cgi?acc=GSE22260
prostate_normal_N06_Yen	polyA+	36	5033982		3661300	903174	2733824	http://www.ncbi.nlm.nih.gov/projects/geo/query/acc.cgi?acc=GSE22260
prostate_normal_N08_Yen	polyA+	36	3211332		2106484	653644	1706886	http://www.ncbi.nlm.nih.gov/projects/geo/query/acc.cgi?acc=GSE22260
prostate_normal_N09_Yen	polyA+	36	3623539		2530310	668783	1933938	http://www.ncbi.nlm.nih.gov/projects/geo/query/acc.cgi?acc=GSE22260
prostate_normal_N11_Yen	polyA+	36	19092632		13741344	3772724	10643396	http://www.ncbi.nlm.nih.gov/projects/geo/query/acc.cgi?acc=GSE22260
prostate_normal_N13_Yen	polyA+	36	19121562		13202922	3587218	10188679	http://www.ncbi.nlm.nih.gov/projects/geo/query/acc.cgi?acc=GSE22260
prostate_normal_N15_Yen	polyA+	36	18715997		13389036	3699549	10394067	http://www.ncbi.nlm.nih.gov/projects/geo/query/acc.cgi?acc=GSE22260
prostate_normal_N19_Yen	polyA+	36	15303756		10527970	3229114	8493099	http://www.ncbi.nlm.nih.gov/projects/geo/query/acc.cgi?acc=GSE22260
prostate_normal_N23_Yen	polyA+	36	19977123		14451600	3466517	10692317	http://www.ncbi.nlm.nih.gov/projects/geo/query/acc.cgi?acc=GSE22260
skeletal_muscle_Burge	polyA+	32	12157505	12157505			12157505	http://www.ncbi.nlm.nih.gov/projects/geo/query/acc.cgi?acc=GSE12946
skeletal_muscle_Raymond	rRNA-depleted	28	30135494	30135494			30135494	ftp://ftp.sra.ebi.ac.uk/vol1/ERA010/ERA010380/illumina_native/
spleen_Raymond	rRNA-depleted	28	25867332	25867332			25867332	ftp://ftp.sra.ebi.ac.uk/vol1/ERA010/ERA010380/illumina_native/
T47D_Burge	polyA+	32	8775920	8775920			8775920	http://www.ncbi.nlm.nih.gov/projects/geo/query/acc.cgi?acc=GSE12946
T47D_Thompson	polyA+	50	35472907		19794804	6057333	15954735	http://www.ncbi.nlm.nih.gov/projects/geo/query/acc.cgi?acc=GSE27003
testes_Burge	polyA+	32	17388782	17388782			17388782	http://www.ncbi.nlm.nih.gov/projects/geo/query/acc.cgi?acc=GSE12946
testes_Raymond	rRNA-depleted	28	25982893	25982893			25982893	ftp://ftp.sra.ebi.ac.uk/vol1/ERA010/ERA010380/illumina_native/
ZR751_Thompson	polyA+	50	32755989		16951940	7902229	16378199	http://www.ncbi.nlm.nih.gov/projects/geo/query/acc.cgi?acc=GSE27003
column totals:			4523304565	2258604039	1260506884	501618984	3390476465
