# Supplementary material for: Pervasive Transcription of the Human Genome Produces Thousands of Previously Unidentified Long Intergenic Noncoding RNAs
Source: PLoS Genet. 2013 Jun 20;9(6):e1003569. doi: 10.1371/journal.pgen.1003569 (PMC3688513; doi:10.1371/journal.pgen.1003569)
Supplement: Table S3 — LincRNA filtering statistics. (XLSX) [file pgen.1003569.s020.xlsx]

## Sheet: Filter Statistics
Table S3. Filter statistics
Counts of transcripts at each filter step:
De novo assembled transcripts	All previously annotated ncRNAs	GENCODE v6 'lincRNAs' & 'processed transcripts'	Filter stage
6833809	351940	39472	input (see Methods)
487328	25873	6227	protein/pseudogene/non-lincRNA ncRNAs/<200nt
388458	19478	5263	primary ORF filter
221184	9688	2563	secondary ORF filter
174817	8925	2414	extended gene filter
101850	3782	945	FPKM > 1
9103	433	123	FPKM > 10
2450	113	42	FPKM > 30
52873	2125	753	merged FPKM > 1
3623	211	94	merged FPKM > 10
915	55	31	merged FPKM > 30
LincRNA counts at each expression level:
Set	lincRNAs	lincRNA groups (see Methods)
all merged FPKM > 1	53864	35585
all merged FPKM > 10	3676	2970
all merged FPKM > 30	925	764
Contribution of each transcript source to final set of merged lincRNAs:
	Number of lincRNAs	% contribution to lincRNA catalog	Expression level
Exclusively de novo:	51739	96.0549	FPKM > 1
	3465	94.2601	FPKM > 10
	870	94.0541	FPKM > 30
Exclusively annotated:	991	1.83982	FPKM > 1
	53	1.44178	FPKM > 10
	10	1.08108	FPKM > 30
Shared between de novo and annotated:	1134	2.1053	FPKM > 1
	158	4.29815	FPKM > 10
	45	4.86486	FPKM > 30
