# Supplementary material for: Pervasive Transcription of the Human Genome Produces Thousands of Previously Unidentified Long Intergenic Noncoding RNAs
Source: PLoS Genet. 2013 Jun 20;9(6):e1003569. doi: 10.1371/journal.pgen.1003569 (PMC3688513; doi:10.1371/journal.pgen.1003569)
Supplement: Table S5 — Fraction of de novo assembled lincRNAs (pre-merging) discovered by de novo assembly in each combined dataset (see Table S2) that are spliced. (XLSX) [file pgen.1003569.s022.xlsx]

## Sheet: Sheet1
Table S5. Counts of total and spliced de novo assembled lincRNAs (pre-merging) discovered in each combined dataset
Combined datasets	library type	# mapped reads	total # lincRNAs FPKM>1	total # lincRNAs FPKM>10	total # lincRNAs FPKM>30	#spliced lincRNAs FPKM>1	#spliced lincRNAs FPKM>10	#spliced lincRNAs FPKM>30	% lincRNAs FPKM>1 that are spliced	% lincRNAs FPKM>10 that are spliced	% lincRNAs FPKM>30 that are spliced
kidney_Gilad	polyA+	20260724	3040	333	62	622	70	20	20.4605	21.021	32.2581
testes_Burge	polyA+	17388782	590	127	35	113	28	4	19.1525	22.0472	11.4286
HeLa_Bartel_miR-155_32hr	polyA+	2198813	17	17	9	3	3	2	17.6471	17.6471	22.2222
HeLa_Bartel_miR-1_12hr	polyA+	4526588	52	46	20	9	9	4	17.3077	19.5652	20
HeLa_Bartel_miR-155_12hr	polyA+	4758102	56	47	20	9	8	6	16.0714	17.0213	30
HeLa_Bartel_WT_12hr	polyA+	5115286	65	44	20	10	7	7	15.3846	15.9091	35
liver_polyA+	polyA+	83584329	5792	414	74	878	74	19	15.1588	17.8744	25.6757
MB435_Burge	polyA+	10957617	136	60	28	20	12	5	14.7059	20	17.8571
heart_Burge	polyA+	8244056	85	51	17	10	9	6	11.7647	17.6471	35.2941
lymph_node_Burge	polyA+	14287364	88	51	22	9	7	5	10.2273	13.7255	22.7273
MeI_Garraway	polyA+	12156128	387	150	41	38	25	10	9.81912	16.6667	24.3902
NEC_from_H9	polyA+	18121381	873	249	84	81	22	8	9.27835	8.83534	9.52381
H9_polyA+_Chen	polyA+	41595559	1668	267	71	143	41	15	8.57314	15.3558	21.1268
skeletal_muscle_Burge	polyA+	12157505	78	41	17	6	6	5	7.69231	14.6341	29.4118
adipose_Burge	polyA+	15452670	52	24	6	4	3	0	7.69231	12.5	0
K562	polyA+	95594121	4456	257	68	323	30	11	7.24865	11.6732	16.1765
T47D_Burge_Thompson	polyA+	44248827	697	119	33	49	8	2	7.03013	6.72269	6.06061
MDAMB468_Thompson	polyA+	40143442	598	92	24	39	10	2	6.52174	10.8696	8.33333
MDAMB231_Thompson	polyA+	28385230	254	79	23	16	3	2	6.29921	3.79747	8.69565
B_Cells_Pritchard	polyA+	730388847	10556	462	105	652	57	11	6.17658	12.3377	10.4762
BT20_Thompson	polyA+	44713682	429	82	27	25	2	1	5.82751	2.43902	3.7037
A549_Myers	polyA+	44135494	6037	276	76	334	40	15	5.53255	14.4928	19.7368
prostate_carcinoma	polyA+	300450529	6776	343	72	363	57	22	5.35714	16.6181	30.5556
breast_Burge	polyA+	9205212	76	50	22	4	3	1	5.26316	6	4.54545
H1_polyA+	polyA+	327488362	5667	314	84	292	53	14	5.15264	16.879	16.6667
prostate_normal	polyA+	114777182	2278	312	61	114	34	8	5.00439	10.8974	13.1148
MCF7_Burge_Thompson	polyA+	48174427	913	117	27	45	7	1	4.92881	5.98291	3.7037
MCF10A_Thompson	polyA+	41470013	289	67	18	14	3	1	4.84429	4.47761	5.55556
HepG2_Caltech_ENCODE	polyA+	161192718	1648	158	45	79	21	9	4.79369	13.2911	20
MIP101	polyA+	190008680	2311	100	23	96	15	5	4.15405	15	21.7391
testes_Raymond	rRNA-depleted	25982893	152	74	28	6	2	1	3.94737	2.7027	3.57143
kidney_Raymond	rRNA-depleted	14709474	471	221	60	15	6	2	3.18471	2.71493	3.33333
adipose_Raymond	rRNA-depleted	13245000	126	58	20	4	2	1	3.1746	3.44828	5
ovary_Raymond	rRNA-depleted	35179025	657	246	73	20	10	3	3.04414	4.06504	4.10959
skeletal_muscle_Raymond	rRNA-depleted	30135494	175	82	28	5	2	2	2.85714	2.43902	7.14286
colon_Raymond	rRNA-depleted	18060138	70	41	18	2	1	0	2.85714	2.43902	0
MeWo_Garraway	polyA+	38251673	818	173	48	23	9	4	2.81174	5.20231	8.33333
ZR751_Thompson	polyA+	32755989	433	65	22	12	1	1	2.77136	1.53846	4.54545
brain_AmbionMAQC	polyA+	63872606	1559	137	23	40	8	2	2.56575	5.83942	8.69565
HeLa_polyA+_Chen	polyA+	35573880	1503	179	39	36	8	2	2.39521	4.46927	5.12821
BT474_Burge_Thompson	polyA+	48643493	1549	120	33	36	10	6	2.32408	8.33333	18.1818
REMC_BreastStem	polyA+	94201386	1779	96	21	39	3	0	2.19224	3.125	0
colon_Burge	polyA+	14973234	49	31	11	1	1	0	2.04082	3.22581	0
melanoma_Garraway_short_term_cultures	polyA+	88993099	4592	400	87	89	34	9	1.93815	8.5	10.3448
REMC_MyoepithelialBreast	polyA+	183424385	3464	130	30	55	8	1	1.58776	6.15385	3.33333
HME_Burge	polyA+	10676314	63	29	19	1	1	1	1.5873	3.44828	5.26316
B_cells_Cheung	polyA+	679651776	15302	571	136	233	27	7	1.52268	4.72855	5.14706
REMC_LuminalBreast	polyA+	273281184	3432	151	31	47	5	1	1.36946	3.31126	3.22581
spleen_Raymond	rRNA-depleted	25867332	228	88	28	3	1	0	1.31579	1.13636	0
CD4_Snyder	rRNA-depleted	43039278	1336	162	51	17	11	5	1.27246	6.79012	9.80392
H9_polyA-_Chen	polyA-	11515512	303	82	37	3	2	1	0.990099	2.43902	2.7027
H1_rRNA-depleted_UCSD_REMC	rRNA-depleted	23303279	3648	555	149	27	10	6	0.740132	1.8018	4.02685
CD4_Plagnol_activated	polyA+	77853870	1504	148	31	10	3	0	0.664894	2.02703	0
CD4_Plagnol_resting	polyA+	62804988	1644	161	35	8	3	0	0.486618	1.86335	0
HeLa_polyA-_Chen	polyA-	12901556	477	54	17	2	1	0	0.419287	1.85185	0
HeLa_Bartel_WT_32hr	polyA+	1398455	9	9	8	0	0	0	0	0	0
HeLa_Bartel_miR-1_32hr	polyA+	1502525	15	15	12	0	0	0	0	0	0
heart_Raymond	rRNA-depleted	13683163	50	37	23	0	0	0	0	0	0
IMR90_UCSD_REMC	rRNA-depleted	14576992	344	147	50	0	0	0	0	0	0
liver_Raymond	rRNA-depleted	13297129	48	36	21	0	0	0	0	0	0
lung_Raymond	rRNA-depleted	12100899	86	56	27	0	0	0	0	0	0
all combined datasets	-	4506637691	101850	9103	2450	5134	836	276	5.49396	8.12332	10.4569
Catalog of merged lincRNAs (Dataset S2)	-	-	53864	3676	925	4576	578	180	8.5	15.7	19.5
